# Supplementary material for: Structure and Dynamics of Three Escherichia coli NfsB Nitro-Reductase Mutants Selected for Enhanced Activity with the Cancer Prodrug CB1954
Source: MDPI journal article supplement (doi:10.3390/ijms24065987), 2023-03-22
Supplement: s1 [file s1]

**Supplementary Table S1.**

**X-ray data collection and refinement statistics of T41L/N71S and T41Q/N71S/F124T NfsB with and without bound nicotinate.**

| <b>Protein</b>              | <b>T41L/N71S</b>                       | <b>T41L/N71S<br/>with nicotinate</b>   | <b>T41Q/N71S/F124T</b>                 | <b>T41Q/N71S/F124T<br/>with nicotinate</b> |
|-----------------------------|----------------------------------------|----------------------------------------|----------------------------------------|--------------------------------------------|
| <b>PDB code</b>             | <b>8C5P</b>                            | <b>8CCV</b>                            | <b>8C5F</b>                            | <b>8C5E</b>                                |
| <i>Data collection</i>      |                                        |                                        |                                        |                                            |
| <b>Wavelength (Å)</b>       | 0.934                                  | 0.934                                  | 0.934                                  | 1.00                                       |
| <b>Resolution range (Å)</b> | 43.16-1.69<br>(1.74-1.69)              | 47.75-2.20<br>(2.26- 2.20)             | 47.85-1.60<br>(1.69-1.60)              | 43.5-1.65<br>(1.70-1.65)                   |
| <b>Space group</b>          | P 4 <sub>1</sub> 2 <sub>1</sub> 2          |
| <b>Unit cell</b>            | 57.2 Å, 57.2 Å, 263 Å<br>90°, 90°, 90° | 56.9 Å, 56.9 Å, 264 Å<br>90°, 90°, 90° | 57.2 Å, 57.2 Å, 262 Å<br>90°, 90°, 90° | 57.6 Å, 57.6 Å, 264 Å<br>90°, 90°, 90°     |
| <b>Total reflections</b>    | 647,523 (11,240)                       | 172,983 (10,839)                       | 345,900 (37,708)                       | 290,689 (18,810)                           |
| <b>Unique reflections</b>   | 49,521 (3,011)                         | 15,934 (1,068)                         | 57,801 (8,552)                         | 53,617 (6,747)                             |
| <b>Multiplicity</b>         | 13.1 (3.54)                            | 10.9 (10.1)                            | 5.9 (4.41)                             | 5.4, (2.79)                                |
| <b>Completeness (%)</b>     | 99.0 (87.5)                            | 96.5 (77.1)                            | 98.6 (92.3)                            | 97.3 (81.4)                                |
| <b>&lt;I/σI&gt; overall</b> | 36.9 (3.4)                             | 24.9 (5.2)                             | 27.2 (5.1)                             | 13.2 (1.9)                                 |

|                                            |                 |                 |                 |                   |
|--------------------------------------------|-----------------|-----------------|-----------------|-------------------|
| <b>Mosaicity</b>                           | 0.096           | 0.214           | 0.112           | 0.124             |
| <b>Wilson B-factor (Å<sup>2</sup>)</b>     | 15.1            | 39.9            | 14.1            | 17.8              |
| <b>Anisotropy</b>                          | 0.339           | 0.46            | 0.071           | 0.044             |
| <b>Rsym<sup>1</sup> (%)</b>                | 5.0 (34.8)      | 7.5 (53.2)      | 4.5 (29.3)      | 7.8 (55.7)        |
| <b><i>Refinement and quality</i></b>       |                 |                 |                 |                   |
| <b>Reflections used in refinement</b>      | 47,036          | 22,344          | 57,878          | 53,648            |
| <b>Reflections used for R-free</b>         | 2,499<br>(5.0%) | 1,138<br>(5.1%) | 2,896<br>(5.0%) | 2,751<br>(5.15 %) |
| <b>R-work<sup>2</sup></b>                  | 0.150           | 0.185           | 0.158           | 0.176             |
| <b>R-free<sup>3</sup></b>                  | 0.188           | 0.243           | 0.181           | 0.217             |
| <b><i>Number of non-hydrogen atoms</i></b> |                 |                 |                 |                   |
| <b>macromolecules</b>                      | 3,485           | 3,352           | 3,418           | 3,402             |
| <b>ligands</b>                             | 114             | 80              | 114             | 84                |
| <b>solvent</b>                             | 545             | 167             | 500             | 517               |
| <b>Protein residues</b>                    | 432             | 432             | 432             | 432               |
| <b>RMSD bond length (Å)</b>                | 0.015           | 0.010           | 0.014           | 0.006             |

|                                                 |       |       |       |       |
|-------------------------------------------------|-------|-------|-------|-------|
| <b>RMSD bond angles (°)</b>                     | 1.82  | 1.70  | 1.52  | 1.03  |
| <b>RMSD chirality</b>                           | 0.102 | 0.087 | 0.101 | 0.079 |
| <b>RMSD planarity</b>                           | 0.014 | 0.010 | 0.010 | 0.004 |
| <b>F<sub>o</sub>-F<sub>c</sub> correlation</b>  | 0.97  | 0.96  | 0.96  | 0.94  |
| <b><i>Ramachandran plot</i></b>                 |       |       |       |       |
| <b>Ramachandran favored (%)</b>                 | 99    | 98    | 99.5  | 100   |
| <b>Ramachandran allowed (%)</b>                 | 1     | 2     | 0.5   | 0     |
| <b>Ramachandran outliers (%)</b>                | 0     | 0     | 0     | 0     |
| <b>Sidechain outliers (%)</b>                   | 0.8   | 2     | 0.6   | 0.8   |
| <b>All atom clashscore</b>                      | 3     | 1     | 2     | 1     |
| <b>RSRZ outliers (%)</b>                        | 0.2   | 2.5   | 0     | 2.3   |
|                                                 |       |       |       |       |
| <b><i>Average B-factors (Å<sup>2</sup>)</i></b> | 19.0  | 55    | 19.0  | 13.0  |
| <b>macromolecules</b>                           | 16    | 52    | 16    | 10    |
| <b>ligands</b>                                  | 33.6  | 45.2  | 33.6  | 15.4  |
| <b>FMN</b>                                      | 10    | 39.5  | 10    | 13    |

|                     |      |      |      |      |
|---------------------|------|------|------|------|
| <b>Nicotinamide</b> | -    | 65   | -    | 20.5 |
| <b>solvent</b>      | 50.7 | 49.6 | 58.1 | 55.2 |

- The numbers in parentheses represent statistics in the highest resolution shell.
- 1.  $R_{\text{sym}} = \sum |I_i - \langle I \rangle| / \sum |I_i|$  where  $I_i$  is the intensity of the  $i$ th measurement, and  $\langle I \rangle$  is the mean intensity for that reflection;
- 2.  $R_{\text{work}} = \sum ||F_o| - |F_c|| / \sum |F_o|$ , where  $F_o$  and  $F_c$  are the observed and calculated structure factors for data used for refinement, respectively.
- 3.  $R_{\text{free}} = \sum ||F_o| - |F_c|| / \sum |F_o|$  for 5% of the data not used at any stage of structural refinement.

### Redox potentials of WT NfsB and mutants.

**Redox potentials of WT NfsB and mutants.**

Titration curves were performed with 50-100  $\mu$ M protein in 50 mM phosphate buffer, pH 7.5, 500 mM KCl, 10% glycerol, in the absence of redox mediators, with two aliquots of the same enzyme preparation. The data was fitted to either 2 single electron transfer steps (equation 1) or a concerted 2 electron transfer step (equation 2) using Sigmaplot14 with equal weighting of all points.

[illegible]

**Supplementary Table S3:****Stopped-flow reduction of WT and mutants by NADH and by CB1954.**

For the NADH reactions solutions containing 10  $\mu\text{M}$  enzyme in one syringe and 25-1000  $\mu\text{M}$  NADH in the other syringe, both in 10 mM Tris pH 7, buffer were mixed rapidly and the absorbance at 340 nm was monitored with time. The pseudo first-order rate constants were obtained by fitting the data at each concentration of substrate to an exponential decay. These were then fitted to a hyperbola in Sigmaplot 14 to obtain the kinetic parameters below. The CB1954 results are from [1].

| Enzyme          | Reduction by NADH     |      |         |                         |     |         |                                              |      |         | CB1954 reduction from [1] |                                              |
|-----------------|-----------------------|------|---------|-------------------------|-----|---------|----------------------------------------------|------|---------|---------------------------|----------------------------------------------|
|                 | k ( $\text{s}^{-1}$ ) | t    | P       | $K_d$ ( $\mu\text{M}$ ) | t   | P       | k/ $K_d$ ( $\mu\text{M}^{-1}\text{s}^{-1}$ ) | t    | P       | k ( $\text{s}^{-1}$ )     | k/ $K_d$ ( $\mu\text{M}^{-1}\text{s}^{-1}$ ) |
|                 |                       |      |         |                         |     |         |                                              |      |         |                           |                                              |
| WT              | 1340 $\pm$ 84         | 15.8 | <0.0001 | 220 $\pm$ 30            | 7.4 | <0.0001 | 6.0 $\pm$ 0.5                                | 12.6 | <0.0001 | > 30                      | 0.029 $\pm$ 0.001                            |
| T41L/N71S       | 260 $\pm$ 11          | 25   | <0.0001 | 160 $\pm$ 15            | 11  | <0.0001 | 1.7 $\pm$ 0.1                                | 17.3 | <0.0001 | > 550                     | 1.6 $\pm$ 0.1                                |
| T41Q/N71S/F124T | 290 $\pm$ 13          | 22   | <0.0001 | 90 $\pm$ 12             | 8   | <0.0001 | 3.0 $\pm$ 0.3                                | 11.7 | <0.0001 | > 400                     | 0.76 $\pm$ 0.02                              |

1 Jarrom, D., Jaberipour, M., Guise, C. P., Daff, S., White, S. A., Searle, P. F. and Hyde, E. I. (2009) Steady-state and stopped-flow kinetic studies of three *Escherichia coli* NfsB mutants with enhanced activity for the prodrug CB1954. *Biochemistry*. **48**, 7665-7672

**Supplementary Table S4:****Selection of quadruple mutations of NfsB**

NfsB was mutated at 8 positions within the active site and the gene introduced into lambda phage. E coli lysogens were made and mutants were selected using the NfsB reduction of CB1954 to activate the SOS response and release phage enriched with more active enzyme. Amino-acid substitutions, frequency and prodrug sensitivity of mutants analysed after 15 rounds of selection:

| T41 | N71 | G120 | F124 | M127 | H128 | W138 | NUMBER | APPROX<br>IC <sub>50</sub> -REPLICA<br>PLATE<br>( $\mu$ M CB1954) | IC <sub>50</sub> colony<br>assay<br>( $\mu$ M CB1954) |
|-----|-----|------|------|------|------|------|--------|-------------------------------------------------------------------|-------------------------------------------------------|
| Q   | S   |      | T    | V    |      |      | 3      | <10                                                               | 4.5                                                   |
| Q   | S   |      | T    | T    |      |      |        | <10                                                               | 5.2                                                   |
| Q   | S   |      | T    | I    |      |      | 2      | <10                                                               | 5.5                                                   |
| Q   | S   |      | T    |      |      |      |        |                                                                   | 5.8                                                   |
| Q   | S   |      | T    | Y    |      |      |        | <10                                                               | 6.5                                                   |
| L   | S   |      |      | F    |      |      | 1      | <20                                                               | 10.8                                                  |
| L   | S   |      |      | V    |      |      |        | <20                                                               | 10.9                                                  |
| L   | S   |      |      | I    |      |      | 2      | <20                                                               | 11.3                                                  |
| L   | S   |      |      | Y    |      |      |        | <20                                                               | 11.3                                                  |
| L   | S   |      |      |      |      |      |        |                                                                   | 14.5                                                  |
| L   | S   | S    | T    | L    |      |      | 1      | <20                                                               | nd                                                    |
| L   | S   |      | T    | T    |      |      | 1      | <20                                                               | nd                                                    |
| L   | S   |      | T    | Y    |      |      | 1      | <15                                                               | nd                                                    |
| Q   | S   |      |      | Y    |      |      | 2      | <10                                                               | nd                                                    |
| Q   | S   | S    | T    | L    |      |      |        | <15                                                               | nd                                                    |

|   |   |  |   |   |  |  |  |     |    |
|---|---|--|---|---|--|--|--|-----|----|
| Q | S |  | T | S |  |  |  | <20 | nd |
| Q | S |  |   | T |  |  |  | <15 | nd |
|   | S |  | T |   |  |  |  | 20  | nd |

**Supplementary Table S5:****Steady-state kinetics parameters for the reduction of CB1954 by NADH catalysed by NfsB mutants.**

Initial rates were monitored at 420 nm at a series of concentrations of both substrates and all the data fitted to the equation for a bi-bi substituted enzyme reaction (equation4), by nonlinear regression with equal weighting all points, using the programme Sigmaplot 14 (Systat software, San Jose, CA). The data for N71S/T41Q/F124T/M127V is from this work. The data for the other mutants is from [1]

| <b>Protein</b>        | <b><math>k_{\text{cat}}</math><br/><math>\text{s}^{-1}</math></b> | <b><math>K_{\text{mCB1954}}</math><br/><math>\mu\text{M}</math></b> | <b><math>k_{\text{cat}}/K_{\text{mCB1954}}</math><br/><math>\mu\text{M}^{-1} \text{s}^{-1}</math></b> | <b><math>K_{\text{mNADH}}</math><br/><math>\mu\text{M}</math></b> | <b><math>k_{\text{cat}}/K_{\text{mNADH}}</math><br/><math>\mu\text{M}^{-1} \text{s}^{-1}</math></b> |
|-----------------------|-------------------------------------------------------------------|---------------------------------------------------------------------|-------------------------------------------------------------------------------------------------------|-------------------------------------------------------------------|-----------------------------------------------------------------------------------------------------|
| N71S/T41Q/F124T/M127V | $270 \pm 17$                                                      | $480 \pm 60$                                                        | $0.57 \pm 0.04$                                                                                       | $100 \pm 13$                                                      | $2.7 \pm 0.2$                                                                                       |
| Wild type             | $140 \pm 32$                                                      | $17200 \pm 4800$                                                    | $0.007 \pm 0.0006$                                                                                    | $40 \pm 12$                                                       | $3.46 \pm 0.6$                                                                                      |
| T41L/N71S             | $153 \pm 8$                                                       | $216 \pm 33$                                                        | $0.71 \pm 0.08$                                                                                       | $253 \pm 41$                                                      | $0.62 \pm 0.08$                                                                                     |
| T41Q/N71S/F124T       | $181 \pm 7$                                                       | $569 \pm 45$                                                        | $0.32 \pm 0.02$                                                                                       | $136 \pm 12$                                                      | $1.33 \pm 0.077$                                                                                    |

1 Jarrom, D., Jaberipour, M., Guise, C. P., Daff, S., White, S. A., Searle, P. F. and Hyde, E. I. (2009) Steady-state and stopped-flow kinetic studies of three *Escherichia coli* NfsB mutants with enhanced activity for the prodrug CB1954. *Biochemistry*. **48**, 7665-7672

**Supplementary Table S6.****X-ray data collection and refinement statistics of T41Q/N71S/F124T/M127V NfsB bound to nicotinate.**

|                                                        |                                        |
|--------------------------------------------------------|----------------------------------------|
| <b>PDB code</b>                                        | <b>8CJ0</b>                            |
| <b><i>Data collection</i></b>                          |                                        |
| <b>Wavelength (Å)</b>                                  | 0.934                                  |
| <b>Resolution range (Å)</b>                            | 35.06-1.99<br>(2.05-1.99)              |
| <b>Space group</b>                                     | P 4 <sub>1</sub> 2 <sub>1</sub> 2      |
| <b>Unit cell</b>                                       | 57.3 Å, 57.3 Å, 266 Å<br>90°, 90°, 90° |
| <b>Total reflections</b>                               | 290,689 (19,436)                       |
| <b>Unique reflections</b>                              | 31,129 (2,176)                         |
| <b>Multiplicity</b>                                    | 9.0 (8.93)                             |
| <b>Completeness (%)</b>                                | 98.9 (95.3)                            |
| <b><math>\langle I/\sigma I \rangle</math> overall</b> | 25.3 (6.2)                             |
| <b>Mosaicity</b>                                       | 0.141                                  |
| <b>Wilson B-factor (Å<sup>2</sup>)</b>                 | 25.9                                   |

|                                            |               |
|--------------------------------------------|---------------|
| <b>Anisotropy</b>                          | 0.167         |
| <b>Rsym<sup>1</sup> (%)</b>                | 7.5 (55.0)    |
| <b><i>Refinement and quality</i></b>       |               |
| <b>Reflections used in refinement</b>      | 31,128 (2168) |
| <b>Reflections used for R-free</b>         | 1,575 (5.1%)  |
| <b>R-work<sup>2</sup></b>                  | 0.170         |
| <b>R-free<sup>3</sup></b>                  | 0.205         |
| <b><i>Number of non-hydrogen atoms</i></b> | 3622          |
| <b>macromolecules</b>                      | 3344          |
| <b>ligands</b>                             | 84            |
| <b>solvent</b>                             | 155           |
| <b>Protein residues</b>                    |               |
| <b>RMSD bond length (Å)</b>                | 0.011         |
| <b>RMSD bond angles (°)</b>                | 1.28          |
| <b>RMSD chirality</b>                      | 0.067         |
| <b>RMSD planarity</b>                      | 0.007         |

|                                                 |      |
|-------------------------------------------------|------|
| <b>F<sub>o</sub>-F<sub>c</sub> correlation</b>  | 0.96 |
| <b><i>Ramachandran plot</i></b>                 |      |
| <b>Ramachandran favored (%)</b>                 | 99.5 |
| <b>Ramachandran allowed (%)</b>                 | 0.5  |
| <b>Ramachandran outliers (%)</b>                | 0    |
| <b>Sidechain outliers (%)</b>                   | 1.7  |
| <b>All atom clash score</b>                     | 2    |
| <b>RSRZ outliers (%)</b>                        | 4.6  |
|                                                 |      |
| <b><i>Average B-factors (Å<sup>2</sup>)</i></b> | 34.0 |
| <b>macromolecules</b>                           | 36   |
| <b>ligands</b>                                  |      |
| <b>FMN</b>                                      | 20   |
| <b>Nicotinamide</b>                             | 42   |
| <b>solvent</b>                                  | 46.4 |

- The numbers in parentheses represent statistics in the highest resolution shell.

- 1.  $R_{\text{sym}} = \sum |I_i - \langle I \rangle| / \sum |I_i|$  where  $I_i$  is the intensity of the  $i$ th measurement, and  $\langle I \rangle$  is the mean intensity for that reflection;
- 2.  $R_{\text{work}} = \sum ||F_o| - |F_c|| / \sum |F_o|$ , where  $F_o$  and  $F_c$  are the observed and calculated structure factors for data used for refinement, respectively.
- 3.  $R_{\text{free}} = \sum ||F_o| - |F_c|| / \sum |F_o|$  for 5% of the data not used at any stage of structural refinement.
