# Supplementary material for: Structure and Dynamics of Three Escherichia coli NfsB Nitro-Reductase Mutants Selected for Enhanced Activity with the Cancer Prodrug CB1954
Source: MDPI journal article supplement (doi:10.3390/ijms24065987), 2023-03-22
Supplement: s1 [file s1]

**Supplementary Table S4:****Selection of quadruple mutations of NfsB**

NfsB was mutated at 8 positions within the active site and the gene introduced into lambda phage. E coli lysogens were made and mutants were selected using the NfsB reduction of CB1954 to activate the SOS response and release phage enriched with more active enzyme.

Amino-acid substitutions, frequency and prodrug sensitivity of mutants analysed after 15 rounds of selection:

| <b>T41</b> | <b>N71</b> | <b>G120</b> | <b>F124</b> | <b>M127</b> | <b>H128</b> | <b>W138</b> | <b>NUMBER</b> | <b>APPROX<br/>IC<sub>50</sub>-<br/>REPLICA<br/>PLATE<br/>(<math>\mu</math>M<br/>CB1954)</b> | <b>IC<sub>50</sub><br/>colony<br/>assay<br/>(<math>\mu</math>M<br/>CB1954)</b> |
|------------|------------|-------------|-------------|-------------|-------------|-------------|---------------|---------------------------------------------------------------------------------------------|--------------------------------------------------------------------------------|
| Q          | S          |             | T           | V           |             |             | 3             | <10                                                                                         | 4.5                                                                            |
| Q          | S          |             | T           | T           |             |             |               | <10                                                                                         | 5.2                                                                            |
| Q          | S          |             | T           | I           |             |             | 2             | <10                                                                                         | 5.5                                                                            |
| Q          | S          |             | T           |             |             |             |               |                                                                                             | 5.8                                                                            |
| Q          | S          |             | T           | Y           |             |             |               | <10                                                                                         | 6.5                                                                            |
| L          | S          |             |             | F           |             |             | 1             | <20                                                                                         | 10.8                                                                           |
| L          | S          |             |             | V           |             |             |               | <20                                                                                         | 10.9                                                                           |
| L          | S          |             |             | I           |             |             | 2             | <20                                                                                         | 11.3                                                                           |
| L          | S          |             |             | Y           |             |             |               | <20                                                                                         | 11.3                                                                           |
| L          | S          |             |             |             |             |             |               |                                                                                             | 14.5                                                                           |
| L          | S          | S           | T           | L           |             |             | 1             | <20                                                                                         | nd                                                                             |
| L          | S          |             | T           | T           |             |             | 1             | <20                                                                                         | nd                                                                             |
| L          | S          |             | T           | Y           |             |             | 1             | <15                                                                                         | nd                                                                             |
| Q          | S          |             |             | Y           |             |             | 2             | <10                                                                                         | nd                                                                             |
| Q          | S          | S           | T           | L           |             |             |               | <15                                                                                         | nd                                                                             |
| Q          | S          |             | T           | S           |             |             |               | <20                                                                                         | nd                                                                             |
| Q          | S          |             |             | T           |             |             |               | <15                                                                                         | nd                                                                             |
|            | S          |             | T           |             |             |             |               | 20                                                                                          | nd                                                                             |
