# Supplementary material for: Structure and Dynamics of Three Escherichia coli NfsB Nitro-Reductase Mutants Selected for Enhanced Activity with the Cancer Prodrug CB1954
Source: MDPI journal article supplement (doi:10.3390/ijms24065987), 2023-03-22
Supplement: s1 [file s1]

**Supplementary Table S6.**

**X-ray data collection and refinement statistics of T41Q/N71S/F124T/M127V NfsB bound to nicotinate.**

|                                    |                                        |
|------------------------------------|----------------------------------------|
| <b>Protein</b>                     | <b>T41Q/N71S/F124T/M127V<br/>NfsB</b>  |
| <b>PDB code</b>                    | <b>8CJ0</b>                            |
| <b><i>Data collection</i></b>      |                                        |
| <b>Wavelength (Å)</b>              | 0.934                                  |
| <b>Resolution range (Å)</b>        | 35.06-1.99<br>(2.05-1.99)              |
| <b>Space group</b>                 | P 4 <sub>1</sub> 2 <sub>1</sub> 2      |
| <b>Unit cell</b>                   | 57.3 Å, 57.3 Å, 266 Å<br>90°, 90°, 90° |
| <b>Total reflections</b>           | 290,689 (19,436)                       |
| <b>Unique reflections</b>          | 31,129 (2,176)                         |
| <b>Multiplicity</b>                | 9.0 (8.93)                             |
| <b>Completeness (%)</b>            | 98.9 (95.3)                            |
| <b><i>&lt;I/σI&gt;</i> overall</b> | 25.3 (6.2)                             |

|                                            |               |
|--------------------------------------------|---------------|
| <b>Mosaicity</b>                           | 0.141         |
| <b>Wilson B-factor (Å<sup>2</sup>)</b>     | 25.9          |
| <b>Anisotropy</b>                          | 0.167         |
| <b>Rsym<sup>1</sup> (%)</b>                | 7.5 (55.0)    |
| <b><i>Refinement and quality</i></b>       |               |
| <b>Reflections used in refinement</b>      | 31,128 (2168) |
| <b>Reflections used for R-free</b>         | 1,575 (5.1%)  |
| <b>R-work<sup>2</sup></b>                  | 0.170         |
| <b>R-free<sup>3</sup></b>                  | 0.205         |
| <b><i>Number of non-hydrogen atoms</i></b> | 3622          |
| <b>macromolecules</b>                      | 3344          |
| <b>ligands</b>                             | 84            |
| <b>solvent</b>                             | 155           |
| <b>Protein residues</b>                    |               |
| <b>RMSD bond length (Å)</b>                | 0.011         |
| <b>RMSD bond angles (°)</b>                | 1.28          |

|                                                 |       |
|-------------------------------------------------|-------|
| <b>RMSD chirality</b>                           | 0.067 |
| <b>RMSD planarity</b>                           | 0.007 |
| <b>F<sub>o</sub>-F<sub>c</sub> correlation</b>  | 0.96  |
| <b><i>Ramachandran plot</i></b>                 |       |
| <b>Ramachandran favored (%)</b>                 | 99.5  |
| <b>Ramachandran allowed (%)</b>                 | 0.5   |
| <b>Ramachandran outliers (%)</b>                | 0     |
| <b>Sidechain outliers (%)</b>                   | 1.7   |
| <b>All atom clash score</b>                     | 2     |
| <b>RSRZ outliers (%)</b>                        | 4.6   |
|                                                 |       |
| <b><i>Average B-factors (Å<sup>2</sup>)</i></b> | 34.0  |
| <b>macromolecules</b>                           | 36    |
| <b>ligands</b>                                  |       |
| <b>FMN</b>                                      | 20    |
| <b>Nicotinamide</b>                             | 42    |

|                |      |
|----------------|------|
| <b>solvent</b> | 46.4 |
|----------------|------|

- The numbers in parentheses represent statistics in the highest resolution shell.
- 1.  $R_{\text{sym}} = \sum |I_i - \langle I \rangle| / \sum |I_i|$  where  $I_i$  is the intensity of the  $i$ th measurement, and  $\langle I \rangle$  is the mean intensity for that reflection;
- 2.  $R_{\text{work}} = \sum ||F_o| - |F_c|| / \sum |F_o|$ , where  $F_o$  and  $F_c$  are the observed and calculated structure factors for data used for refinement, respectively.
- 3.  $R_{\text{free}} = \sum ||F_o| - |F_c|| / \sum |F_o|$  for 5% of the data not used at any stage of structural refinement.
