# Supplementary material for: Structure and Dynamics of Three Escherichia coli NfsB Nitro-Reductase Mutants Selected for Enhanced Activity with the Cancer Prodrug CB1954
Source: MDPI journal article supplement (doi:10.3390/ijms24065987), 2023-03-22
Supplement: s1 [file s1]

### Supplementary Table S3:

#### Stopped-flow reduction of WT and mutants by NADH and by CB1954.

For the NADH reactions solutions containing 10  $\mu\text{M}$  enzyme in one syringe and 25-1000  $\mu\text{M}$  NADH in the other syringe, both in 10 mM Tris pH 7, buffer were mixed rapidly and the absorbance at 340 nm was monitored with time. The pseudo first-order rate constants were obtained by fitting the data at each concentration of substrate to an exponential decay. These were then fitted to a hyperbola in Sigmaplot 14 to obtain the kinetic parameters below. The CB1954 results are from [1].

| Enzyme          | Reduction by NADH     |      |         |                         |     |         |                                               |      |         | CB1954 reduction from [1] |                                               |
|-----------------|-----------------------|------|---------|-------------------------|-----|---------|-----------------------------------------------|------|---------|---------------------------|-----------------------------------------------|
|                 | k ( $\text{s}^{-1}$ ) | t    | P       | $K_d$ ( $\mu\text{M}$ ) | t   | P       | k/ $K_d$ ( $\mu\text{M}^{-1} \text{s}^{-1}$ ) | t    | P       | k ( $\text{s}^{-1}$ )     | k/ $K_d$ ( $\mu\text{M}^{-1} \text{s}^{-1}$ ) |
|                 |                       |      |         |                         |     |         |                                               |      |         |                           |                                               |
| WT              | 1340 $\pm$ 84         | 15.8 | <0.0001 | 220 $\pm$ 30            | 7.4 | <0.0001 | 6.0 $\pm$ 0.5                                 | 12.6 | <0.0001 | > 30                      | 0.029 $\pm$ 0.001                             |
| T41L/N71S       | 260 $\pm$ 11          | 25   | <0.0001 | 160 $\pm$ 15            | 11  | <0.0001 | 1.7 $\pm$ 0.1                                 | 17.3 | <0.0001 | > 550                     | 1.6 $\pm$ 0.1                                 |
| T41Q/N71S/F124T | 290 $\pm$ 13          | 22   | <0.0001 | 90 $\pm$ 12             | 8   | <0.0001 | 3.0 $\pm$ 0.3                                 | 11.7 | <0.0001 | > 400                     | 0.76 $\pm$ 0.02                               |

1 Jarrom, D., Jaberipour, M., Guise, C. P., Daff, S., White, S. A., Searle, P. F. and Hyde, E. I. (2009) Steady-state and stopped-flow kinetic studies of three *Escherichia coli* NfsB mutants with enhanced activity for the prodrug CB1954. *Biochemistry*. **48**, 7665-7672
