# Supplementary material for: Structure and Dynamics of Three Escherichia coli NfsB Nitro-Reductase Mutants Selected for Enhanced Activity with the Cancer Prodrug CB1954
Source: MDPI journal article supplement (doi:10.3390/ijms24065987), 2023-03-22
Supplement: s1 [file s1]

### Supplementary Table S2:

### Redox potentials of WT NfsB and mutants.

Titration experiments were performed with 50-100  $\mu\text{M}$  protein in 50 mM phosphate buffer, pH 7.5, 500 mM KCl, 10% glycerol, in the absence of redox mediators, with two aliquots of the same enzyme preparation. The data was fitted to either 2 single electron transfer steps (equation 1) or a concerted 2 electron transfer step (equation 2) using Sigmaplot14 with equal weighting of all points.

[illegible]
