# Supplementary material for: Structure and Dynamics of Three Escherichia coli NfsB Nitro-Reductase Mutants Selected for Enhanced Activity with the Cancer Prodrug CB1954
Source: MDPI journal article supplement (doi:10.3390/ijms24065987), 2023-03-22
Supplement: s1 [file s1]

## Supplementary Table S5

### Steady-state kinetics parameters for the reduction of CB1954 by NADH catalysed by NfsB mutants.

Initial rates were monitored at 420 nm at a series of concentrations of both substrates and all the data fitted to the equation for a bi-bi substituted enzyme reaction (equation4), by nonlinear regression with equal weighting all points, using the programme Sigmaplot 14 (Systat software, San Jose, CA). The data for N71S/T41Q/F124T/M127V is from this work. The data for the other mutants is from [1]

| Protein               | $k_{cat}$<br>$s^{-1}$ | $K_{mCB1954}$<br>$\mu M$ | $k_{cat}/K_{mCB1954}$<br>$\mu M^{-1} s^{-1}$ | $K_{mNADH}$<br>$\mu M$ | $k_{cat}/K_{mNADH}$<br>$\mu M^{-1} s^{-1}$ |
|-----------------------|-----------------------|--------------------------|----------------------------------------------|------------------------|--------------------------------------------|
| N71S/T41Q/F124T/M127V | $270 \pm 17$          | $480 \pm 60$             | $0.57 \pm 0.04$                              | $100 \pm 13$           | $2.7 \pm 0.2$                              |
| Wild type             | $140 \pm 32$          | $17200 \pm 4800$         | $0.007 \pm 0.0006$                           | $40 \pm 12$            | $3.46 \pm 0.6$                             |
| T41L/N71S             | $153 \pm 8$           | $216 \pm 33$             | $0.71 \pm 0.08$                              | $253 \pm 41$           | $0.62 \pm 0.08$                            |
| T41Q/N71S/F124T       | $181 \pm 7$           | $569 \pm 45$             | $0.32 \pm 0.02$                              | $136 \pm 12$           | $1.33 \pm 0.077$                           |

1 Jarrom, D., Jaberipour, M., Guise, C. P., Daff, S., White, S. A., Searle, P. F. and Hyde, E. I. (2009) Steady-state and stopped-flow kinetic studies of three Escherichia coli NfsB mutants with enhanced activity for the prodrug CB1954. *Biochemistry*. **48**, 7665-7672
